# Supplementary material for: Dengue Virus Non-Structural Protein 5 as a Versatile, Multi-Functional Effector in Host–Pathogen Interactions
Source: Front Cell Infect Microbiol. 2021 Mar 18;11:574067. doi: 10.3389/fcimb.2021.574067 (PMC8015806; doi:10.3389/fcimb.2021.574067)
Supplement: Supplementary file 3 [file Table_2.xlsx]

## Sheet: Supplementary table2
	Supplementary Table. 2. KEGG Pathway analysis for DENV-NS5 interacting human proteins using WEB-based GEne SeT AnaLysis Toolkit
Gene Set	Description	Link	Size	Overlap	Expect	Enrichment Ratio	p-value	FDR	Overlap ID	User ID
hsa03040	Spliceosome	http://www.kegg.jp/kegg-bin/show_pathway?hsa03040+10189+10594+10992+1655+23020+23451+24148+27339+3178+3192+3310+5093+6427+6625+6626+6629+6631+6632+6633+6635+8175+84950+9343+9410+9416	133	25	3.65837	6.83365	1.19904e-14	3.94484e-12	10189;10594;10992;1655;23020;23451;24148;27339;3178;3192;3310;5093;6427;6625;6626;6629;6631;6632;6633;6635;8175;84950;9343;9410;9416	DDX5;SNRPA;PRPF38A;SNRNP70;SNRPB2;SNRPC;SRSF2;ALYREF;DDX23;EFTUD2;PRPF19;PRPF6;PRPF8;SF3A2;SF3B1;SF3B2;SNRNP200;SNRNP40;SNRPD1;SNRPD2;SNRPE;HSPA6;PCBP1;HNRNPU;HNRNPA1
hsa05203	Viral carcinogenesis	http://www.kegg.jp/kegg-bin/show_pathway?hsa05203+1017+10971+1654+2033+23352+23513+27044+2885+2934+4792+5700+6774+7157+7529+7531+7532+7533+7534	201	18	5.52881	3.25567	9.24786e-06	0.00152127	1017;10971;1654;2033;23352;23513;27044;2885;2934;4792;5700;6774;7157;7529;7531;7532;7533;7534	NFKBIA;UBR4;DDX3X;SCRIB;PSMC1;YWHAB;YWHAG;YWHAZ;EP300;YWHAE;YWHAQ;GRB2;YWHAH;CDK2;TP53;STAT3;SND1;GSN
hsa05162	Measles	http://www.kegg.jp/kegg-bin/show_pathway?hsa05162+1017+1965+3310+3455+3459+3460+4792+6772+6773+6774+7157+7297+916+917	132	14	3.63086	3.85583	1.41791e-05	0.00155497	1017;1965;3310;3455;3459;3460;4792;6772;6773;6774;7157;7297;916;917	CD3E;CD3G;NFKBIA;IFNAR2;STAT2;TYK2;IFNGR1;IFNGR2;STAT1;CDK2;TP53;STAT3;HSPA6;EIF2S1
hsa04110	Cell cycle	http://www.kegg.jp/kegg-bin/show_pathway?hsa04110+1017+10971+2033+2810+4176+5591+7157+7529+7531+7532+7533+7534+7709	124	13	3.41081	3.81141	3.27531e-05	0.00269395	1017;10971;2033;2810;4176;5591;7157;7529;7531;7532;7533;7534;7709	ZBTB17;MCM7;YWHAB;YWHAG;YWHAZ;EP300;YWHAE;YWHAQ;YWHAH;SFN;CDK2;TP53;PRKDC
hsa04141	Protein processing in endoplasmic reticulum	http://www.kegg.jp/kegg-bin/show_pathway?hsa04141+10956+10970+1965+23193+2923+3301+3309+3310+3326+3703+51009+6184+6238+7415+811	165	15	4.53858	3.305	4.43551e-05	0.00291857	10956;10970;1965;23193;2923;3301;3309;3310;3326;3703;51009;6184;6238;7415;811	CALR;OS9;DERL2;HSP90AB1;HSPA5;DNAJA1;VCP;HSPA6;PDIA3;RPN1;CKAP4;STT3A;EIF2S1;RRBP1;GANAB
hsa05169	Epstein-Barr virus infection	http://www.kegg.jp/kegg-bin/show_pathway?hsa05169+1017+2923+3455+4792+567+5700+5708+6772+6773+6774+7157+7297+7431+811+916+917	201	16	5.52881	2.89393	0.000122687	0.00650016	1017;2923;3455;4792;567;5700;5708;6772;6773;6774;7157;7297;7431;811;916;917	CALR;CD3E;CD3G;NFKBIA;IFNAR2;STAT2;TYK2;VIM;PSMC1;STAT1;B2M;CDK2;TP53;STAT3;PSMD2;PDIA3
hsa04217	Necroptosis	http://www.kegg.jp/kegg-bin/show_pathway?hsa04217+2752+283748+292+329+3326+3455+3459+3460+5478+6772+6773+6774+7297+7417	162	14	4.45606	3.14179	0.000138301	0.00650016	2752;283748;292;329;3326;3455;3459;3460;5478;6772;6773;6774;7297;7417	BIRC2;HSP90AB1;IFNAR2;PPIA;STAT2;TYK2;IFNGR1;IFNGR2;STAT1;STAT3;VDAC2;PLA2G4D;GLUL;SLC25A5
hsa03010	Ribosome	http://www.kegg.jp/kegg-bin/show_pathway?hsa03010+55052+6125+6128+6129+6136+6137+6143+6160+6182+6201+6232+9045	134	12	3.68588	3.25567	0.000299812	0.0123298	55052;6125;6128;6129;6136;6137;6143;6160;6182;6201;6232;9045	RPL5;RPL6;RPS27;RPS7;MRPL20;RPL12;RPL14;RPL13;RPL7;RPL19;RPL31;MRPL12
hsa05168	Herpes simplex infection	http://www.kegg.jp/kegg-bin/show_pathway?hsa05168+1017+10189+1965+2033+3455+3459+3460+406+4792+6427+6772+6773+7157+7297	185	14	5.08871	2.75119	0.000547955	0.0190786	1017;10189;1965;2033;3455;3459;3460;406;4792;6427;6772;6773;7157;7297	NFKBIA;ARNTL;IFNAR2;STAT2;TYK2;IFNGR1;IFNGR2;SRSF2;ALYREF;STAT1;EP300;CDK2;TP53;EIF2S1
hsa05161	Hepatitis B	http://www.kegg.jp/kegg-bin/show_pathway?hsa05161+1017+10971+1654+2033+2885+4792+6772+6773+6774+7157+7529+7534	144	12	3.96094	3.02958	0.000579897	0.0190786	1017;10971;1654;2033;2885;4792;6772;6773;6774;7157;7529;7534	NFKBIA;DDX3X;STAT2;YWHAB;STAT1;YWHAZ;EP300;YWHAQ;GRB2;CDK2;TP53;STAT3
hsa04659	Th17 cell differentiation	http://www.kegg.jp/kegg-bin/show_pathway?hsa04659+2475+3326+3459+3460+4792+6772+6774+7297+916+917	107	10	2.9432	3.39766	0.00068308	0.0194767	2475;3326;3459;3460;4792;6772;6774;7297;916;917	CD3E;CD3G;NFKBIA;HSP90AB1;TYK2;IFNGR1;IFNGR2;STAT1;STAT3;MTOR
hsa05130	Pathogenic Escherichia coli infection	http://www.kegg.jp/kegg-bin/show_pathway?hsa05130+10971+1499+2017+7534+79861+81873+9181	55	7	1.51286	4.627	0.000710397	0.0194767	10971;1499;2017;7534;79861;81873;9181	TUBAL3;YWHAZ;YWHAQ;CTNNB1;ARPC5L;CTTN;ARHGEF2
hsa04630	JAK-STAT signaling pathway	http://www.kegg.jp/kegg-bin/show_pathway?hsa04630+10401+2033+2475+2885+3455+3459+3460+6772+6773+6774+7297+8554	162	12	4.45606	2.69296	0.00163304	0.0413285	10401;2033;2475;2885;3455;3459;3460;6772;6773;6774;7297;8554	PIAS1;IFNAR2;PIAS3;STAT2;TYK2;IFNGR1;IFNGR2;STAT1;EP300;GRB2;STAT3;MTOR
Key:
The False Discovery Rate (FDR) is the estimated probability that a gene set with a given Normalized Expression Score represents a false positive finding.
p-value estimates the statistical significance of the enrichment score for a single gene set.
Size represents the number of genes in the reference set.
Overlap represents the number of genes in the input gene set found to fall in a particular category.
"Suppose that we have n genes in the interesting gene set (A) and m genes in the reference gene set (B). Suppose further that there are k genes in A and j genes in B that are in a given category (C) (e.g. a GO category, a KEGG pathway, a BioCarta pathway etc.). Based on the reference gene set, the expected value of k would be ke = (n/m)* j.If k exceeds the above expected value, category C is said…
